# Supplementary material for: Diminishing effects of mechanical loading over time during rat Achilles tendon healing
Source: PubMed Central journal article supplement (PMC7735574; doi:10.1371/journal.pone.0236681), 2020-12-14
Supplement: pone.0236681.s002.pdf [file pone.0236681.s002.pdf]

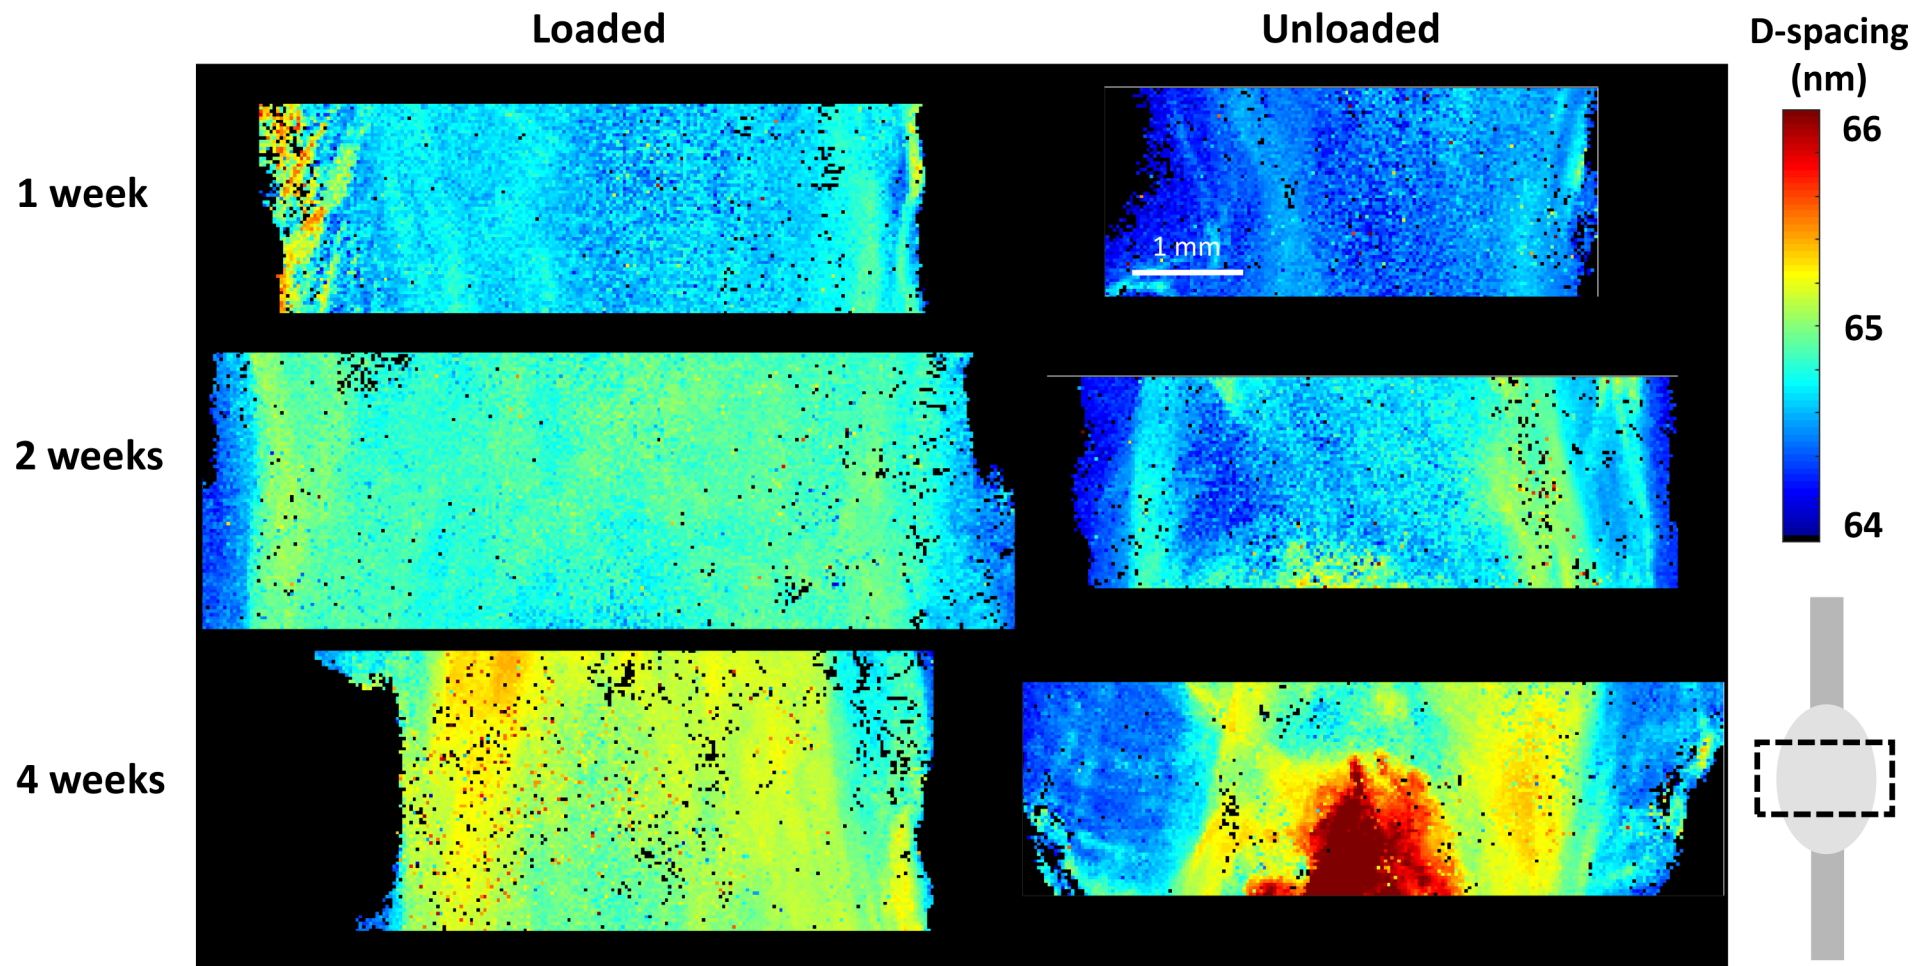

**SUPPLEMENTARY Figure 2:** SAXS mapping of the D-spacing parameter in the callus region in representative loaded and unloaded samples at 1, 2 and 4 weeks of healing.
