# Supplementary material for: Diminishing effects of mechanical loading over time during rat Achilles tendon healing
Source: PubMed Central journal article supplement (PMC7735574; doi:10.1371/journal.pone.0236681), 2020-12-14
Supplement: pone.0236681.s003.pdf [file pone.0236681.s003.pdf]

**SUPPLEMENTARY Table 1:** Summary of all mechanical testing data. Data is represented as mean (standard deviation).

|                                         |                 | W1             |               | W2                      |                           | W4                          |                               |
|-----------------------------------------|-----------------|----------------|---------------|-------------------------|---------------------------|-----------------------------|-------------------------------|
|                                         |                 | Normal loading | Unloading     | Normal loading          | Unloading                 | Normal loading              | Unloading                     |
|                                         | N               | 10             | 9             | 10                      | 10                        | 10                          | 10                            |
| Callus length (mm)                      |                 | 5.5 (1.5)      | 4.1 (0.6)     | 7.1 (2.7) *             | 4.6 (2.3) *               | 4.9 (1.5) <sup>ψ</sup>      | 3.8 (1.2)                     |
| Cross-sectional area (mm <sup>2</sup> ) |                 | 23.3 (6.4) **  | 10.7 (2.9) ** | 20.8 (6.5)              | 16.6 (6.1) <sup>ψ</sup>   | 17.8 (3.9)                  | 15.6 (3.9)                    |
| Creep magnitude (mm)                    | 5N creep        | 2.0 (0.3) *    | 1.1 (0.1) *   | 1.7 (0.5) *             | 1.4 (0.4) *               | 1.5 (0.3) #                 | 1.4 (0.4)                     |
|                                         | 12N creep       | 1.7 (0.4)      | -             | 1.4 (0.4)               | 0.6 (0.4)                 | 1.2 (0.2) #                 | 1.1 (0.3) <sup>ψ</sup>        |
| Creep ratio (%)                         | 5N creep        | 40 (16) *      | 28 (3) *      | 25 (6) * <sup>ψ</sup>   | 33 (9) *                  | 33 (8)                      | 37(4) #                       |
|                                         | 12N             | 41 (14)        | -             | 29 (20)                 | 32 (7)                    | 27 (6)                      | 29 (5)                        |
| Stiffness (N/mm)                        | 5N creep        | 3.1 (0.4) **   | 4.9 (0.7) **  | 4.2 (1.4)               | 4.9 (1.7)                 | 4.5 (2.0)                   | 4.4 (1.0)                     |
|                                         | 12N creep       | 6.8 (1.0)      | -             | 10.4 (2.4)              | 10.2 (2.6)                | 6.1 (1.5)                   | 11.0 (2.8)                    |
|                                         | Load to failure | 14.5 (4.5) *   | 7.8 (1.0) *   | 22.5 (3.9) <sup>ψ</sup> | 21.7 (4.1)                | 28.0 (4.4) ###              | 25.8 (6.1) ###                |
| Young's modulus (MPa)                   | 5N creep        | 0.8 (0.4) *    | 2.0 (0.7) *   | 1.4 (0.5)               | 1.3 (0.4)                 | 1.2 (0.4)                   | 1.1 (0.4) ##                  |
|                                         | 12N creep       | 2.2 (1.1)      | -             | 3.1 (0.9)               | 2.8 (0.9)                 | 2.4 (0.4)                   | 2.7 (0.8)                     |
|                                         | Load to failure | 3.9 (2.0)      | 3.2 (1.0)     | 6.9 (1.8)               | 6.1 (1.7) <sup>ψψ</sup>   | 7.6 (2.0) ##                | 6.5 (2.2) ###                 |
| Peak force (N)                          |                 | 24.1 (6.4) **  | 11.4 (1.0) ** | 46.8 (20.0) *           | 27.0 (4.9) * <sup>ψ</sup> | 60.2 (17.9) ##              | 55.0 (18.2) <sup>ψψ</sup> ### |
| Peak stress (MPa)                       |                 | 1.1 (0.3)      | 1.1 (0.3)     | 2.2 (0.6) <sup>ψψ</sup> | 1.9 (0.6) <sup>ψ</sup>    | 3.4 (0.6) <sup>ψψ</sup> ### | 3.6 (0.9) <sup>ψψψ</sup> ###  |

\* p < 0.05, \*\* p < 0.01, \*\*\* p < 0.001

\* significant difference between normal loading and unloading by botox, within the same time point

# significant difference between week 1 and 4, within the same treatment group

<sup>ψ</sup> significant difference between this and previous time point, within the same treatment group
