# Supplementary material for: Diminishing effects of mechanical loading over time during rat Achilles tendon healing
Source: PubMed Central journal article supplement (PMC7735574; doi:10.1371/journal.pone.0236681), 2020-12-14
Supplement: pone.0236681.s004.pdf [file pone.0236681.s004.pdf]

**SUPPLEMENTARY Table 2:** Summary of results from SAXS analysis from the full tendon and the separate regions of interest.

Data is represented as mean (standard deviation).

|                            |             | Week 1         |               | Week 2         |               | Week 4         |               |
|----------------------------|-------------|----------------|---------------|----------------|---------------|----------------|---------------|
|                            |             | Normal loading | Unloading     | Normal loading | Unloading     | Normal loading | Unloading     |
|                            | N           | 7              | 8             | 6              | 7             | 6              | 7             |
| D-spacing (nm)             | Full tendon | 64.63 (0.03)   | 64.54 (0.02)  | 64.88 (0.02)   | 64.80 (0.06)  | 65.04 (0.04)   | 65.09 (0.19)  |
|                            | Lateral     | 64.57 (0.06)   | 64.54 (0.05)  | 64.89 (0.02)   | 64.73 (0.07)  | 65.05 (0.07)   | 65.07 (0.19)  |
|                            | Centre      | 64.70 (0.02)   | 64.60 (0.06)  | 64.86 (0.04)   | 64.86 (0.06)  | 65.07 (0.03)   | 65.06 (0.10)  |
|                            | Medial      | 64.70 (0.02)   | 64.60 (0.06)  | 64.86 (0.06)   | 64.86 (0.04)  | 65.07 (0.03)   | 65.06 (0.10)  |
| Intrafibrillar order (AU)  | Full tendon | 0.017 (0.001)  | 0.016 (0.002) | 0.022 (0.005)  | 0.018 (0.005) | 0.048 (0.016)  | 0.038 (0.020) |
|                            | Lateral     | 0.016 (0.002)  | 0.016 (0.004) | 0.020 (0.004)  | 0.015 (0.005) | 0.041 (0.014)  | 0.033 (0.017) |
|                            | Centre      | 0.014 (0.002)  | 0.012 (0.001) | 0.022 (0.004)  | 0.013 (0.001) | 0.039 (0.011)  | 0.037 (0.024) |
|                            | Medial      | 0.020 (0.003)  | 0.020 (0.005) | 0.026 (0.008)  | 0.023 (0.002) | 0.063 (0.027)  | 0.044 (0.021) |
| Degree of orientation (AU) | Full tendon | 0.42 (0.01)    | 0.44 (0.01)   | 0.45 (0.02)    | 0.45 (0.02)   | 0.46 (0.01)    | 0.46 (0.02)   |
|                            | Lateral     | 0.42 (0.02)    | 0.43 (0.02)   | 0.45 (0.01)    | 0.45 (0.02)   | 0.46 (0.01)    | 0.46 (0.02)   |
|                            | Centre      | 0.42 (0.01)    | 0.43 (0.02)   | 0.44 (0.02)    | 0.45 (0.02)   | 0.46 (0.04)    | 0.46 (0.04)   |
|                            | Medial      | 0.43 (0.01)    | 0.45 (0.02)   | 0.47 (0.03)    | 0.46 (0.04)   | 0.45 (0.01)    | 0.47 (0.02)   |
| FWHM (nm)                  | Full tendon | 7.60 (0.23)    | 7.60 (0.23)   | 8.17 (0.40)    | 8.86 (0.47)   | 8.32 (0.25)    | 8.05 (0.45)   |
|                            | Lateral     | 7.77 (0.31)    | 7.39 (0.37)   | 8.17 (0.48)    | 8.85 (0.36)   | 8.35 (0.28)    | 8.22 (0.49)   |
|                            | Centre      | 8.03 (0.42)    | 8.40 (0.35)   | 8.62 (0.41)    | 9.79 (0.77)   | 8.60 (0.27)    | 8.45 (0.44)   |
|                            | Medial      | 6.98 (0.24)    | 7.38 (0.60)   | 7.69 (0.55)    | 7.88 (0.48)   | 8.02 (0.24)    | 7.46 (0.50)   |
| Anisotropy (degrees)       | Full tendon | 138.2 (4.5)    | 135.6 (4.9)   | 142.8 (7.0)    | 134.0 (3.2)   | 125.0 (16.4)   | 127.7 (10.6)  |
|                            | Lateral     | 134.7 (8.8)    | 133.3 (8.0)   | 143.8 (2.7)    | 143.2 (5.2)   | 128.3 (15.0)   | 131.1 (9.8)   |
|                            | Centre      | 136.6 (6.4)    | 136.3 (5.2)   | 144.6 (6.9)    | 140.4 (8.0)   | 137.6 (17.9)   | 133.9 (17.8)  |
|                            | Medial      | 142.6 (7.8)    | 137.0 (6.5)   | 139.7 (15.2)   | 120.1 (10.5)  | 109.4 (22.4)   | 117.7 (17.8)  |
